# Supplementary material for: Highly regioselective synthesis of fused seven-membered rings through copper-catalyzed cross-coupling
Source: Royal Society of Chemistry journal article supplement (doi:10.1039/c2cc37891d), 2012-12-03
Supplement: c2cc37891d.pdf [file c2cc37891d.pdf]

## Supporting Information

### Highly Regioselective Synthesis of Fused Seven-Membered Ring through Copper-Catalyzed Cross-Coupling

Peng Sang,<sup>a</sup> Ming Yu,<sup>a</sup> Hangfei Tu,<sup>a</sup> Jianwei Zou,<sup>a,b</sup> and Yuhong Zhang<sup>\*a,c</sup>

<sup>a</sup> Department of Chemistry, Zhejiang University, Hangzhou 310027, China.

<sup>b</sup> Ningbo Institute of Technology, Zhejiang University, Ningbo 315104, China.

<sup>c</sup> State Key Laboratory of Applied Organic Chemistry, Lanzhou University, Lanzhou 730000, China.

Email : [yhzhang@zju.edu.cn](mailto:yhzhang@zju.edu.cn)

#### Table of contents

|                                                                                                                           |     |
|---------------------------------------------------------------------------------------------------------------------------|-----|
| General experimental procedures.....                                                                                      | S2  |
| General procedure for synthesis of substrates.....                                                                        | S2  |
| Characterization data of compounds <b>2a-h</b> .....                                                                      | S2  |
| General procedure for synthesis of indole-fused dibenzo[ <i>b,f</i> ][1,4]oxazepines.....                                 | S5  |
| Characterization data of compounds <b>3a-l</b> .....                                                                      | S5  |
| Characterization data of intermediates <b>6a</b> and <b>7a</b> in control experiments.....                                | S12 |
| Representation of the X-ray crystal structure of <b>3d</b> .....                                                          | S13 |
| References.....                                                                                                           | S14 |
| The <sup>1</sup> H and <sup>13</sup> C NMR spectra of compounds <b>2a-h</b> , <b>3a-l</b> , <b>6a</b> and <b>7a</b> ..... | S15 |

## General experimental procedures

Unless otherwise stated, all reactions were carried out under N<sub>2</sub>, 2-halophenols and solvents were obtained from commercial sources and used without any further purification. <sup>1</sup>H NMR spectra were recorded at 400 MHz or 500 MHz using TMS as internal standard. <sup>13</sup>C NMR spectra were recorded at 100 MHz or 125MHz using TMS as internal standard. The multiplicities are reported as follows: singlet (s), doublet (d), doublet of doublets (dd), triplet (t), quartet (q), multiplet (m). Coupling constants are reported in Hertz (Hz). Mass spectroscopy data were collected on HRMS-EI and HRMS-ESI instrument.

## General procedure for synthesis of substrates

**2a-g** were prepared according to the method of reference 1, and **2h** was prepared according to the method of reference 2.

## Characterization data of compounds 2a-h

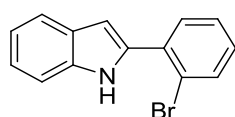

**2a**

**2-(2-Bromophenyl)-1H-indole (2a).** <sup>1</sup>H NMR (CDCl<sub>3</sub>, 500 MHz) δ 8.63 (s, 1H), 7.66-7.79 (m, 2H), 7.61 (dd, 1H, *J* = 7.5 Hz, 1.5Hz), 7.42 (d, 1H, *J* = 8.5 Hz), 7.38 (td, 1H, *J* = 7.5 Hz, 1.0Hz), 7.19-7.23 (m, 2H), 7.14 (t, 1H, *J* = 7.0 Hz), 6.82 (d, 1H, *J* = 1.0 Hz). <sup>13</sup>C NMR (CDCl<sub>3</sub>, 125 MHz) δ 131.0, 131.0, 128.8, 128.2, 126.2, 124.0, 122.9, 122.5, 117.4, 116.1, 115.6, 115.0, 105.8, 98.4.

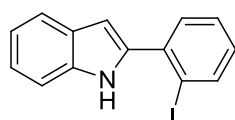

**2b**

**2-(2-Iodophenyl)-1H-indole (2b).** <sup>3</sup> <sup>1</sup>H NMR (DMSO-*d*<sub>6</sub>, 500 MHz) δ 11.38 (s, 1H), 8.04 (t, 1H, *J* = 7.0 Hz), 7.60 (d, 1H, *J* = 8.0 Hz), 7.50-7.55 (m, 2H), 7.42 (d, 1H, *J* = 8.0 Hz), 7.13-7.18 (m, 2H), 7.03-7.06 (m, 1H), 6.70 (d, 1H, *J* = 1.5 Hz). <sup>13</sup>C NMR

(DMSO-*d*<sub>6</sub>, 125 MHz)  $\delta$  139.9, 139.0, 137.9, 136.2, 130.9, 129.7, 128.3, 127.7, 121.5, 120.2, 119.2, 111.4, 102.0, 98.5.

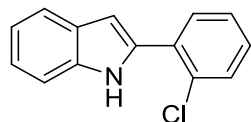

**2c**

**2-(2-Chlorophenyl)-1H-indole (2c).** <sup>1</sup>H NMR (DMSO-*d*<sub>6</sub>, 500 MHz)  $\delta$  11.45 (s, 1H), 7.74 (dd, 1H, *J* = 7.5 Hz, 1.0 Hz), 7.60 (t, 2H, *J* = 7.0 Hz), 7.43-7.49 (m, 2H), 7.39 (t, 1H, *J* = 7.5 Hz), 7.13-7.16 (m, 1H), 7.03 (t, 1H, *J* = 7.0 Hz), 6.89 (d, 1H, *J* = 1.0 Hz). <sup>13</sup>C NMR (DMSO-*d*<sub>6</sub>, 125 MHz)  $\delta$  136.5, 134.2, 131.3, 131.0, 130.6, 130.6, 129.0, 127.9, 127.5, 121.9, 120.3, 119.3, 111.4, 103.0.

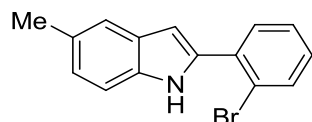

**2d**

**2-(2-Bromophenyl)-5-methyl-1H-indole (2d).** <sup>1</sup>H NMR (CDCl<sub>3</sub>, 500 MHz)  $\delta$  8.55 (s, 1H), 7.67 (d, 1H, *J* = 8.0 Hz), 7.59 (dd, 1H, *J* = 7.5 Hz, 1.0 Hz), 7.44 (s, 1H), 7.35-7.38 (m, 1H), 7.31 (d, 1H, *J* = 8.5 Hz), 7.19 (td, 1H, *J* = 8.0 Hz, 1.5 Hz), 7.05 (d, 1H, *J* = 8.0 Hz), 6.73 (d, 1H, *J* = 1.5 Hz), 2.46 (s, 3H). <sup>13</sup>C NMR (CDCl<sub>3</sub>, 125 MHz)  $\delta$  136.3, 134.6, 134.0, 133.6, 131.4, 129.4, 129.1, 128.5, 127.7, 124.3, 121.3, 120.4, 110.7, 103.2, 21.5.

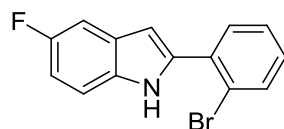

**2e**

**2-(2-Bromophenyl)-5-fluoro-1H-indole (2e).** <sup>1</sup>H NMR (CDCl<sub>3</sub>, 500 MHz)  $\delta$  8.61 (s, 1H), 7.67 (d, 1H, *J* = 8.0 Hz), 7.57 (d, 1H, *J* = 7.5 Hz), 7.37 (t, 1H, *J* = 7.5 Hz), 7.28-7.32 (m, 2H), 7.19-7.22 (m, 1H), 6.96 (td, 1H, *J* = 9.5 Hz, 2.5 Hz), 6.76 (s, 1H). <sup>13</sup>C

NMR (CDCl<sub>3</sub>, 125 MHz)  $\delta$  158.1 ( $J_{CF} = 233.1$  Hz), 138.0, 134.1, 133.1, 132.8, 131.4, 129.5, 128.5 ( $J_{CF} = 9.1$  Hz), 127.8, 121.3, 111.5 ( $J_{CF} = 72.8$  Hz), 111.3 ( $J_{CF} = 90.4$  Hz), 105.5 ( $J_{CF} = 23.6$  Hz), 103.7 ( $J_{CF} = 4.4$  Hz). (EI):  $m/z$  (%) = 291 ([M<sup>+</sup>+H], 97), 290 ([M]<sup>+</sup>, 17), 209 (33), 183 (100), 149 (31), 104 (38).

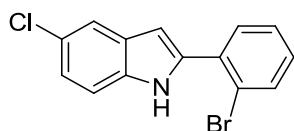

**2f**

**2-(2-Bromophenyl)-5-chloro-1H-indole (2f).** <sup>1</sup>H NMR (CDCl<sub>3</sub>, 500 MHz)  $\delta$  8.61 (s, 1H), 7.66 (d, 1H,  $J = 8.0$  Hz), 7.60 (s, 1H), 7.55 (d, 1H,  $J = 8.0$  Hz), 7.34-7.37 (m, 1H), 7.29 (d, 1H,  $J = 8.5$  Hz), 7.18-7.21 (m, 1H), 7.14-7.16 (m, 1H), 6.72 (s, 1H). <sup>13</sup>C NMR (CDCl<sub>3</sub>, 125 MHz)  $\delta$  137.7, 134.6, 134.1, 133.0, 131.4, 129.6, 129.2, 127.8, 125.8, 122.9, 121.3, 120.2, 112.1, 103.2. (EI):  $m/z$  (%) = 307 ([M]<sup>+</sup>, 40), 305 (31), 165 (100), 65 (21), 51 (23).

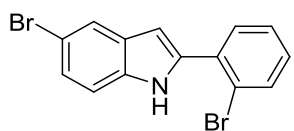

**2g**

**5-Bromo-2-(2-bromophenyl)-1H-indole (2g).** <sup>1</sup>H NMR (CDCl<sub>3</sub>, 500 MHz)  $\delta$  8.68 (s, 1H), 7.77 (s, 1H), 7.68 (d, 1H,  $J = 8.0$  Hz), 7.58 (dd, 1H,  $J = 8.0$  Hz, 1.5 Hz), 7.36-7.39 (m, 1H), 7.29 (s, 2H), 7.22 (td, 1H,  $J = 8.0$  Hz, 1.5 Hz), 6.73 (d, 1H,  $J = 2.0$  Hz). <sup>13</sup>C NMR (CDCl<sub>3</sub>, 125 MHz)  $\delta$  137.5, 134.8, 134.1, 132.9, 131.5, 129.9, 129.6, 127.8, 125.4, 123.3, 121.3, 113.4, 112.5, 103.1. (EI):  $m/z$  (%) = 351 ([M]<sup>+</sup>, 1), 250 (100), 206 (23), 172 (16), 71 (23).

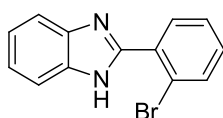

**2h**

**2-(2-Bromophenyl)-1H-benzo[d]imidazole (2h).**  $^1\text{H}$  NMR (DMSO- $d_6$ , 400 MHz)  $\delta$  12.79 (s, 1H), 7.82 (d, 1H,  $J = 7.6$  Hz), 7.76 (d, 1H,  $J = 7.2$  Hz), 7.70 (d, 1H,  $J = 6.4$  Hz), 7.55 (t, 2H,  $J = 6.8$  Hz), 7.46 (t, 1H,  $J = 7.2$  Hz), 7.24 (s, 2H).  $^{13}\text{C}$  NMR (DMSO- $d_6$ , 100 MHz)  $\delta$  150.8, 143.5, 134.8, 133.8, 132.7, 132.6, 131.8, 128.2, 123.1, 122.0, 121.9, 119.5, 112.0.

### General procedure for synthesis of indole-fused dibenzo[*b,f*][1,4]oxazepines

A sealable tube (20 mL) was charged with CuI (3.8 mg, 0.02mmol), dibenzoylmethane (4.5 mg, 0.02 mmol), tripotassium phosphate (127.4 mg, 0.6 mmol), the 2-halophenol (**1**, 0.24 mmol) and the 2-(2-halophenyl)-1H-indole (**2**, 0.20 mmol). DMF (2 mL) was added and the tube sealed. The mixture was allowed to stir under  $\text{N}_2$  at 120 °C for 12 h. Saturated aqueous NaCl (25 mL), and EtOAc (25 mL) were added to the cooled reaction mixture successively. The organic phase was separated, and the aqueous phase was further extracted with EtOAc ( $2 \times 25$  mL). The combined organic layers were dried over anhydrous  $\text{NaSO}_4$  and concentrated. The residue was purified by column chromatography on silica gel using petroleum ether as eluent to provide the desired products (**3**).

### Characterization data of compounds 3a-l

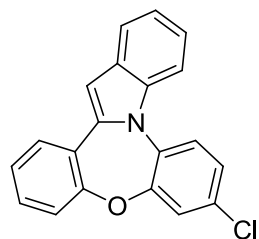

**3a**

**8-Chlorodibenzo[*b,f*]indolo[1,2-*d*][1,4]oxazepine (3a) [New compound].** Eluent: petroleum ether. White solid, mp = 133-135 °C (uncorrected).  $^1\text{H}$  NMR (DMSO- $d_6$ , 400 MHz)  $\delta$  7.75-7.79 (m, 3H), 7.69 (t, 2H,  $J = 7.2$  Hz), 7.49 (d, 1H,  $J = 8.0$  Hz), 7.38-7.44 (m, 2H), 7.19-7.33 (m, 3H), 7.05 (s, 1H).  $^{13}\text{C}$  NMR (DMSO- $d_6$ , 100 MHz)  $\delta$  157.3, 153.6, 136.4, 136.3, 131.0, 130.8, 130.4, 129.7, 129.0, 126.8, 126.6, 125.9,

124.3, 123.6, 123.2, 122.0, 121.5, 121.4, 111.7, 104.1. HRMS (EI) Calcd for  $C_{20}H_{12}NOCl$  (M)<sup>+</sup> 317.0607; Found, 317.0604.

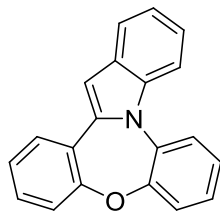

**3b**

**Indolo[1,2-*d*]dibenzo[*b,f*][1,4]oxazepine (3b) [New compound].** Eluent: petroleum ether. White solid, mp = 135-137 °C (uncorrected). <sup>1</sup>H NMR (DMSO-*d*<sub>6</sub>, 400 MHz) δ 7.75-7.79 (m, 2H), 7.70 (d, 2H, *J* = 8.8 Hz), 7.54-7.57 (m, 1H), 7.37-7.44 (m, 2H), 7.31-7.35 (m, 2H), 7.18-7.29 (m, 3H), 7.02 (s, 1H). <sup>13</sup>C NMR (DMSO-*d*<sub>6</sub>, 100 MHz) δ 157.7, 153.3, 136.7, 136.4, 131.3, 130.7, 129.7, 129.0, 128.0, 126.6, 126.5, 124.8, 124.5, 123.5, 123.0, 121.9, 121.5, 121.3, 111.7, 103.7. HRMS (EI) Calcd for  $C_{20}H_{13}NO$  (M)<sup>+</sup> 283.0997; Found, 283.0996.

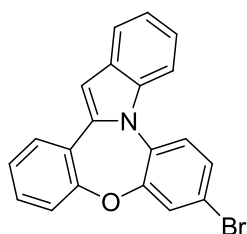

**3c**

**8-Bromodibenzo[*b,f*]indolo[1,2-*d*][1,4]oxazepine (3c) [New compound].** Eluent: petroleum ether. White solid, mp = 133-135 °C (uncorrected). <sup>1</sup>H NMR (DMSO-*d*<sub>6</sub>, 500 MHz) δ 7.91 (d, 1H, *J* = 2.0 Hz), 7.82 (dd, 1H, *J* = 8.0 Hz, 1.5 Hz), 7.72-7.77 (m, 3H), 7.56 (dd, 1H, *J* = 8.0 Hz, 2.0 Hz), 7.52 (dd, 1H, *J* = 8.5 Hz, 1.0 Hz), 7.46 (td, 1H, *J* = 7.5 Hz, 1.5 Hz), 7.35 (td, 1H, *J* = 7.5 Hz, 1.0 Hz), 7.30 (td, 1H, *J* = 7.0 Hz, 1.0 Hz), 7.23-7.26 (m, 1H), 7.08 (s, 1H). <sup>13</sup>C NMR (DMSO-*d*<sub>6</sub>, 125 MHz) δ 162.2, 158.6, 141.2, 135.8, 135.7, 134.6, 134.5, 133.9, 131.6, 131.2, 130.9, 129.2, 128.5, 126.9, 126.4, 126.3, 123.7, 116.5, 109.1, 109.0. HRMS (EI) Calcd for  $C_{20}H_{12}NOBr$  (M)<sup>+</sup> 361.0102; Found, 361.0107.

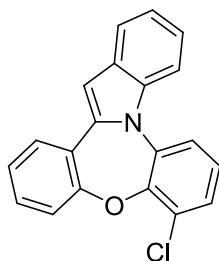

**3d**

**9-Chlorodibenzo[*b,f*]indolo[1,2-*d*][1,4]oxazepine (3d) [New compound].** Eluent: petroleum ether. White solid, mp = 133-135 °C (uncorrected).  $^1\text{H}$  NMR (DMSO- $d_6$ , 500 MHz)  $\delta$  7.83 (d, 1H,  $J = 7.5$  Hz), 7.71-7.75 (m, 3H), 7.51-7.55 (m, 2H), 7.44-7.47 (m, 1H), 7.35 (t, 2H,  $J = 8.5$  Hz), 7.29 (t, 1H,  $J = 7.0$  Hz), 7.24 (t, 1H,  $J = 7.5$  Hz), 7.08 (s, 1H).  $^{13}\text{C}$  NMR (DMSO- $d_6$ , 125 MHz)  $\delta$  156.5, 148.3, 136.2, 135.9, 132.7, 130.3, 129.4, 128.6, 127.5, 126.9, 126.7, 126.6, 124.1, 123.3, 121.8, 121.3, 121.2, 111.5, 104.0. HRMS (EI) Calcd for  $\text{C}_{20}\text{H}_{12}\text{ClNO}$  ( $\text{M}^+$ ) 317.0607; Found, 317.0608.

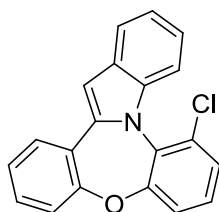

**3e**

**6-Chlorodibenzo[*b,f*]indolo[1,2-*d*][1,4]oxazepine (3e) [New compound].** Eluent: petroleum ether. White solid, mp = 151-153 °C (uncorrected).  $^1\text{H}$  NMR ( $\text{CDCl}_3$ , 500 MHz)  $\delta$  7.69-7.73 (m, 2H), 7.33-7.36 (m, 2H), 7.26-7.32 (m, 4H), 7.21-7.24 (m, 3H), 6.84 (s, 1H).  $^{13}\text{C}$  NMR ( $\text{CDCl}_3$ , 125 MHz)  $\delta$  158.9, 157.8, 136.6, 136.3, 130.0, 129.8, 129.6, 128.8, 128.3, 128.0, 127.7, 126.1, 125.3, 122.2, 121.2, 120.9, 120.8, 120.5, 113.8, 104.4. HRMS (EI) Calcd for  $\text{C}_{20}\text{H}_{12}\text{ClNO}$  ( $\text{M}^+$ ) 317.0607; Found, 317.0606.

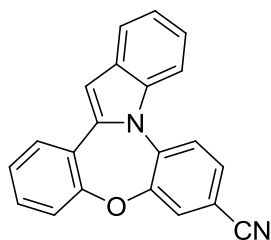

**3f**

**Dibenzo[*b,f*]indolo[1,2-*d*][1,4]oxazepine-8-carbonitrile (3f) [New compound].**

Eluent: petroleum ether. White solid, mp = 173-175 °C (uncorrected). <sup>1</sup>H NMR (CDCl<sub>3</sub>, 500 MHz) δ 7.87 (d, 1H, *J* = 8.0 Hz), 7.68-7.73 (m, 4H), 7.57 (dd, 1H, *J* = 8.5 Hz, 2.0 Hz), 7.36-7.39 (m, 1H), 7.32-7.34 (m, 1H), 7.27-7.30 (m, 3H), 6.93 (s, 1H). <sup>13</sup>C NMR (CDCl<sub>3</sub>, 125 MHz) δ 157.2, 153.3, 136.7, 136.6, 136.6, 130.3, 129.6, 129.4, 128.7, 126.7, 126.3, 125.2, 124.3, 123.6, 122.4, 121.5, 120.9, 117.7, 111.4, 109.9, 104.8. HRMS (EI) Calcd for C<sub>21</sub>H<sub>12</sub>N<sub>2</sub>O (M)<sup>+</sup> 308.0950; Found, 308.0955.

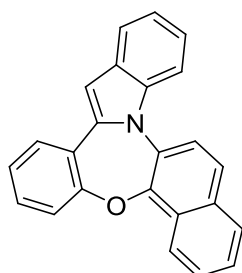

**3g**

**Benzo[*f*]naphtho[1,2-*b*]indolo[1,2-*d*][1,4]oxazepine (3g) [New compound].**

Eluent: petroleum ether. White solid, mp = 166-168 °C (uncorrected). <sup>1</sup>H NMR (CDCl<sub>3</sub>, 500 MHz) δ 8.63 (d, 1H, *J* = 8.0 Hz), 7.89 (t, 2H, *J* = 9.0 Hz), 7.79 (d, 1H, *J* = 8.0 Hz), 7.73-7.76 (m, 3H), 7.65 (t, 1H, *J* = 8.0 Hz), 7.53 (t, 2H, *J* = 8.5 Hz), 7.31-7.34 (m, 1H), 7.26-7.28 (m, 2H), 7.21-7.24 (m, 1H), 6.93 (s, 1H). <sup>13</sup>C NMR (CDCl<sub>3</sub>, 125 MHz) δ 158.5, 148.3, 137.3, 136.9, 132.7, 129.6, 129.3, 129.1, 128.2, 128.0, 127.7, 127.1, 126.4, 125.7, 125.5, 125.2, 122.8, 122.6, 121.9, 121.5, 121.2, 111.6, 103.3. HRMS (EI) Calcd for C<sub>24</sub>H<sub>15</sub>NO (M)<sup>+</sup> 333.1154; Found, 333.1156.



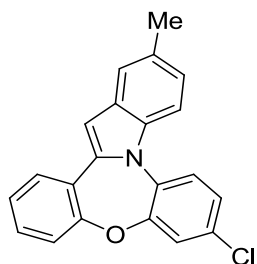

**3h**

**2-Methyl-8-chlorodibenzo[*b,f*]indolo[1,2-*d*][1,4]oxazepine (3h) [New compound].**

Eluent: petroleum ether. White solid, mp = 143-145 °C (uncorrected). <sup>1</sup>H NMR (CDCl<sub>3</sub>, 500 MHz) δ 7.71 (dd, 1H, *J* = 8.0 Hz, 1.5Hz), 7.67 (d, 1H, *J* = 8.5 Hz), 7.57 (d, 1H, *J* = 8.5 Hz), 7.49 (s, 1H), 7.45 (d, 1H, *J* = 2.5 Hz), 7.30-7.34 (m, 2H), 7.26 (t, 1H, *J* = 1.0 Hz), 7.23-7.25 (m, 1H), 7.10 (dd, 1H, *J* = 8.0 Hz, 1.0Hz), 6.80 (s, 1H), 2.48 (s, 3H). <sup>13</sup>C NMR (CDCl<sub>3</sub>, 125 MHz) δ 152.3, 148.5, 131.5, 129.8, 126.1, 125.8, 125.7, 124.6, 124.2, 124.0, 120.7, 120.5, 119.7, 119.6, 119.4, 117.9, 115.7, 115.6, 105.8, 98.0, 16.2. HRMS (EI) Calcd for C<sub>21</sub>H<sub>14</sub>NOCl (M)<sup>+</sup> 331.0764; Found, 331.0768.

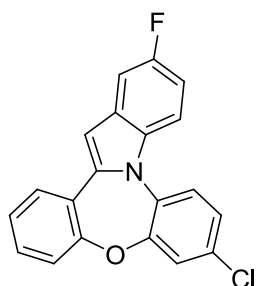

**3i**

**2-Fluoro-8-chlorodibenzo[*b,f*]indolo[1,2-*d*][1,4]oxazepine (3i) [New compound].**

Eluent: petroleum ether. White solid, mp = 162-164 °C (uncorrected). <sup>1</sup>H NMR (CDCl<sub>3</sub>, 500 MHz) δ 7.70 (d, 1H, *J* = 8.0 Hz), 7.64 (d, 1H, *J* = 8.0 Hz), 7.59-7.61 (m, 1H), 7.46 (d, 1H, *J* = 2.0 Hz), 7.31-7.38 (m, 3H), 7.26-7.28 (m, 2H), 7.00 (td, 1H, *J* = 9.0 Hz, 2.5 Hz), 6.83 (s, 1H). <sup>13</sup>C NMR (CDCl<sub>3</sub>, 125 MHz) δ 158.7 (*J*<sub>CF</sub> = 235 Hz), 155.8 (*J*<sub>CF</sub> = 463.1 Hz), 138.3, 133.2, 131.8, 130.6, 130.3, 129.8, 129.7, 129.3, 126.1, 125.9, 124.9, 124.4, 123.3, 121.0, 111.8 (*J*<sub>CF</sub> = 100.1 Hz), 111.7 (*J*<sub>CF</sub> = 116.4 Hz),

106.0 ( $J_{CF} = 23.9$  Hz), 103.3 ( $J_{CF} = 5.0$  Hz). HRMS (EI) Calcd for  $C_{20}H_{11}NOFCl$  (M)  
+ 335.0513; Found, 335.0512.

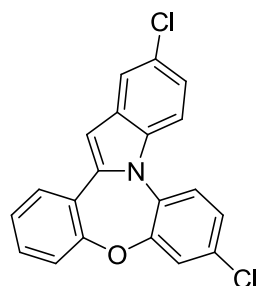

**3j**

**2-Chloro-8-chlorodibenzo[*b,f*]indolo[1,2-*d*][1,4]oxazepine (3j) [New compound].**

Eluent: petroleum ether. White solid, mp = 165-167 °C (uncorrected).  $^1H$  NMR (CDCl<sub>3</sub>, 500 MHz)  $\delta$  7.64 (dd, 1H,  $J = 8.0$  Hz, 1.5 Hz), 7.61 (d, 1H,  $J = 2.0$  Hz), 7.52-7.54 (m, 2H), 7.42 (d, 1H,  $J = 2.5$  Hz), 7.27-7.34 (m, 2H), 7.19-7.23 (m, 2H), 7.16 (dd, 1H,  $J = 9.0$  Hz, 2.0 Hz), 6.75 (s, 1H).  $^{13}C$  NMR (CDCl<sub>3</sub>, 125 MHz)  $\delta$  157.6, 153.9, 138.1, 135.0, 132.0, 130.4, 130.3, 129.4, 127.2, 126.1, 125.9, 124.9, 124.3, 123.3, 123.2, 121.1, 120.6, 112.4, 103.0. HRMS (EI) Calcd for  $C_{20}H_{11}NOCl_2$  (M)<sup>+</sup> 351.0218; Found, 351.0219.

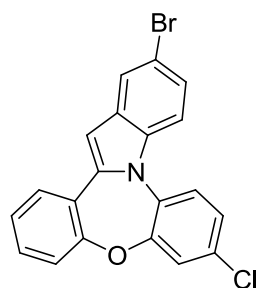

**3k**

**2-Bromo-8-chlorodibenzo[*b,f*]indolo[1,2-*d*][1,4]oxazepine (3k) [New compound].**

Eluent: petroleum ether. White solid, mp = 174-176 °C (uncorrected).  $^1H$  NMR (CDCl<sub>3</sub>, 500 MHz)  $\delta$  7.79 (d, 1H,  $J = 1.5$  Hz), 7.67 (d, 1H,  $J = 8.0$  Hz), 7.57 (d, 1H,  $J = 8.5$  Hz), 7.51 (d, 1H,  $J = 9.0$  Hz), 7.44 (d, 1H,  $J = 2.0$  Hz), 7.29-7.37 (m, 3H), 7.23-

7.26 (m, 2H), 6.78 (s, 1H).  $^{13}\text{C}$  NMR ( $\text{CDCl}_3$ , 125 MHz)  $\delta$  157.7, 154.0, 137.9, 135.3, 132.0, 130.9, 130.4, 130.3, 129.4, 126.1, 125.9, 125.8, 125.0, 124.3, 123.7, 123.3, 121.0, 114.7, 112.7, 102.8. HRMS (EI) Calcd for  $\text{C}_{20}\text{H}_{11}\text{NOBrCl}$  ( $\text{M}$ ) $^+$  394.9713; Found, 394.9712.

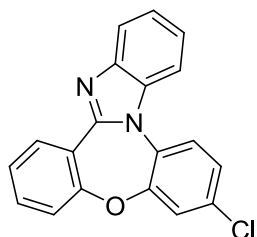

**3I**

**8-Chlorodibenzo[*b,f*]benzimidazo[1,2-*d*][1,4]oxazepine (3I) [New compound].**

Eluent: petroleum ether / ethyl acetate (20:1). White solid, mp = 199-201 °C (uncorrected).  $^1\text{H}$  NMR ( $\text{CDCl}_3$ , 500 MHz)  $\delta$  8.22 (dd, 1H,  $J = 7.5$  Hz, 2.0Hz), 7.94 (dd, 1H,  $J = 7.0$  Hz, 1.0Hz), 7.68-7.71 (m, 2H), 7.50-7.53 (m, 2H), 7.31-7.43 (m, 5H).  $^{13}\text{C}$  NMR ( $\text{CDCl}_3$ , 125 MHz)  $\delta$  158.9, 153.4, 149.5, 143.8, 134.1, 133.1, 132.5, 130.7, 128.8, 126.3, 126.2, 124.0, 123.9, 123.8, 123.5, 122.7, 121.0, 120.7, 111.2. HRMS (EI) Calcd for  $\text{C}_{19}\text{H}_{11}\text{N}_2\text{OCl}$  ( $\text{M}$ ) $^+$  318.0560; Found, 318.0561.

### Characterization data of intermediates 6a and 7a in control experiments

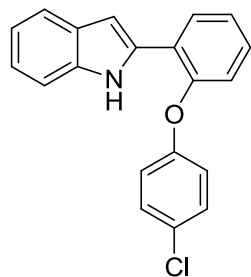

**6a**

**2-(2-(4-chlorophenoxy)phenyl)-1H-indole (6a)** [New compound].  $^1\text{H}$  NMR ( $\text{CDCl}_3$ , 400 MHz)  $\delta$  9.31 (s, 1H), 7.88-7.90 (m, 1H), 7.63 (d, 1H,  $J = 8.0$  Hz), 7.36 (d, 1H,  $J = 7.6$  Hz), 7.31-7.33 (m, 2H), 7.21-7.24 (m, 2H), 7.17 (t, 1H,  $J = 7.6$  Hz), 7.10 (t, 1H,  $J = 7.2$  Hz), 7.02 (d, 2H,  $J = 9.2$  Hz), 6.95 (d, 1H,  $J = 1.2$  Hz), 6.89-6.92 (m, 1H).  $^{13}\text{C}$  NMR ( $\text{CDCl}_3$ , 100 MHz)  $\delta$  155.0, 153.2, 136.3, 134.5, 130.0, 129.1, 128.6, 128.5, 128.0, 124.4, 123.3, 122.2, 120.4, 120.4, 120.0, 119.6, 110.9, 101.1. HRMS (EI) Calcd for  $\text{C}_{20}\text{H}_{14}\text{NOCl}$  ( $\text{M}$ ) $^+$  319.0764; Found, 319.0770.

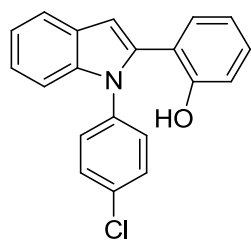

**7a**

**2-(1-(4-chlorophenyl)-1H-indol-2-yl)phenol (7a)** [New compound].  $^1\text{H}$  NMR ( $\text{CDCl}_3$ , 400 MHz)  $\delta$  7.68-7.70 (m, 1H), 7.29-7.32 (m, 3H), 7.21-7.23 (m, 2H), 7.18 (d, 1H,  $J = 8.0$  Hz), 7.12 (d, 2H,  $J = 8.4$  Hz), 6.93 (d, 1H,  $J = 8.0$  Hz), 6.88 (d, 1H,  $J = 7.2$  Hz), 6.81 (s, 1H), 6.75 (t, 1H,  $J = 7.2$  Hz), 5.84 (s, 1H).  $^{13}\text{C}$  NMR ( $\text{CDCl}_3$ , 100 MHz)  $\delta$  153.8, 138.4, 136.1, 134.5, 133.0, 131.0, 130.1, 129.4, 128.7, 128.0, 123.1, 121.2, 120.8, 120.1, 118.1, 115.6, 110.6, 104.5. HRMS (EI) Calcd for  $\text{C}_{20}\text{H}_{14}\text{NOCl}$  ( $\text{M}$ ) $^+$  319.0764; Found, 319.0763.

**Representation of the X-ray crystal structure of 3d (CCDC 890740)**

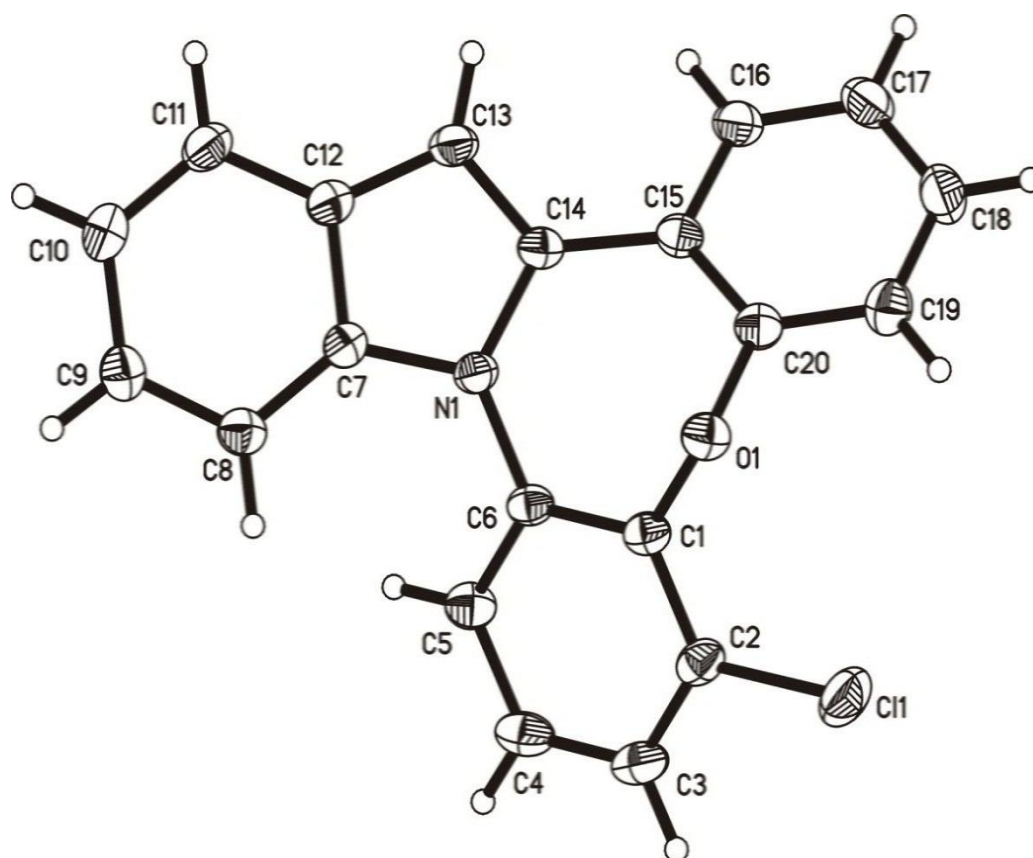

## References

- 1 (a) E. Fischer and F. Jourdan, *Chem. Ber.*, 1883, **16**, 2241; (b) Y. Liu and W. W. McWhorter, *J. Am. Chem. Soc.*, 2003, **125**, 4240.
- 2 S. Xu, J. Lu and H. Fu, *Chem. Commun.*, 2011, **47**, 5596.
- 3 I. Bennacef, C. N. Haile, A. Schmidt, A. O. Koren, J. P. Seibyl, J. K. Staley, F. Bois, R. M. Baldwin and G. Tamagnan, *Bioorg. Med. Chem.*, 2006, **14**, 7582.

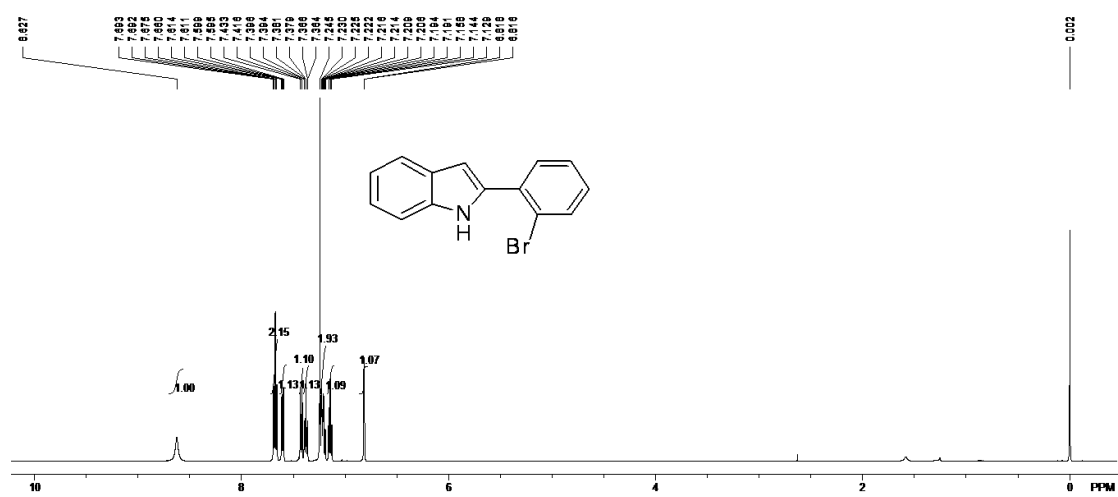

<sup>1</sup>H NMR of substrate **2a**

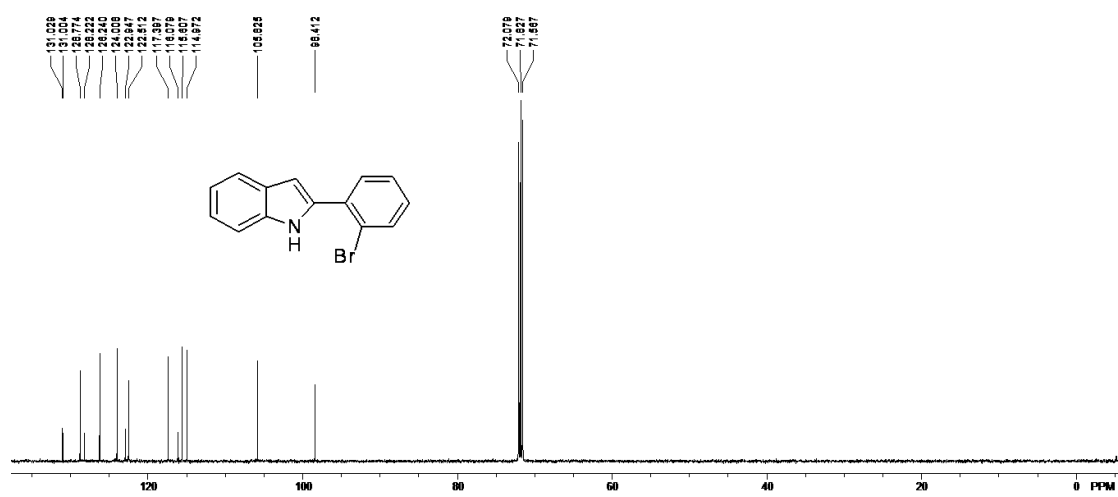

<sup>13</sup>C NMR of substrate **2a**

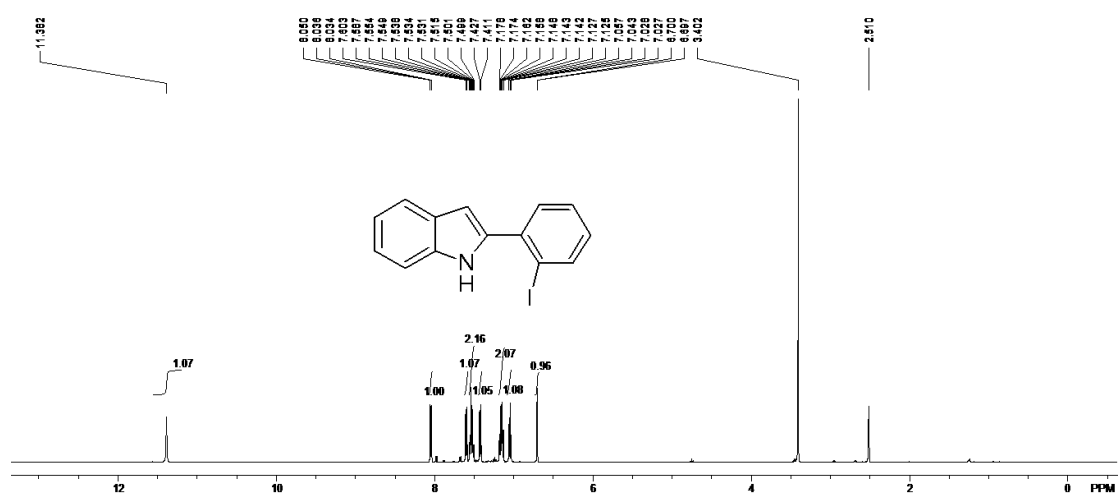

<sup>1</sup>H NMR of substrate **2b**

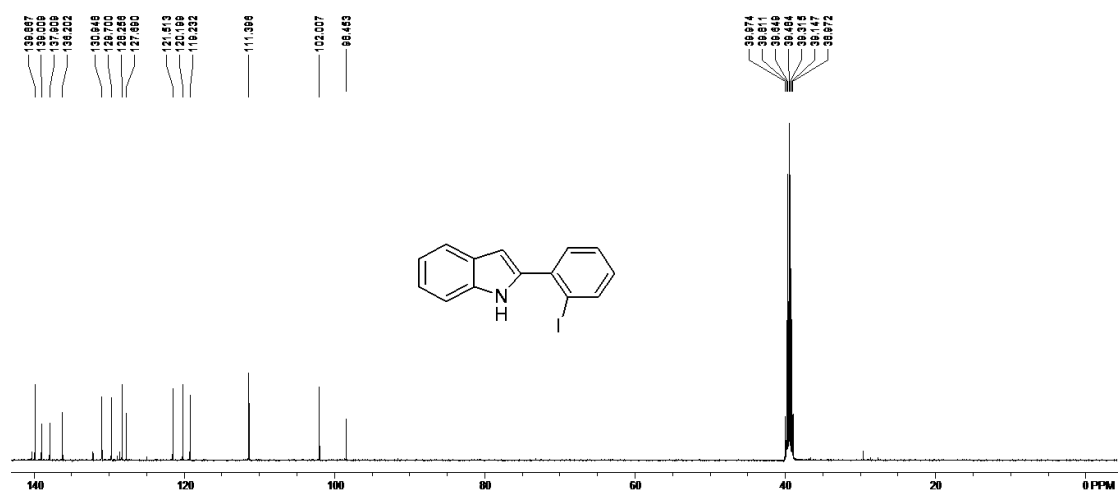

<sup>13</sup>C NMR of substrate **2b**

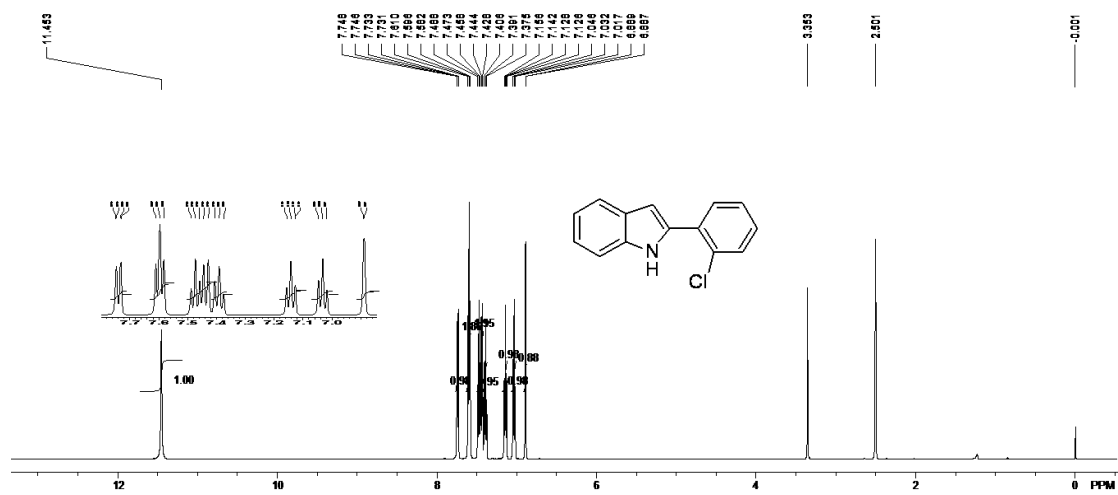

<sup>1</sup>H NMR of substrate **2c**



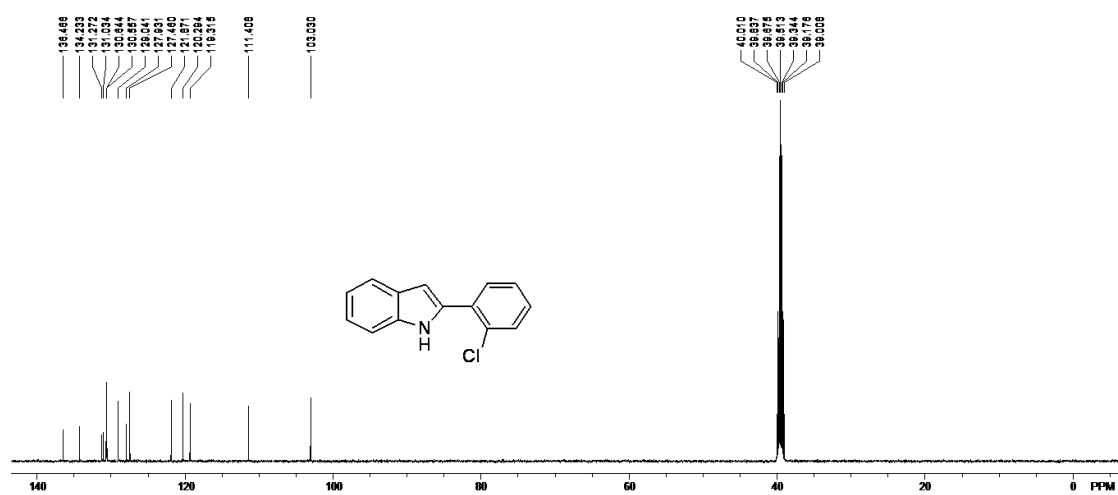

<sup>13</sup>C NMR of substrate **2c**

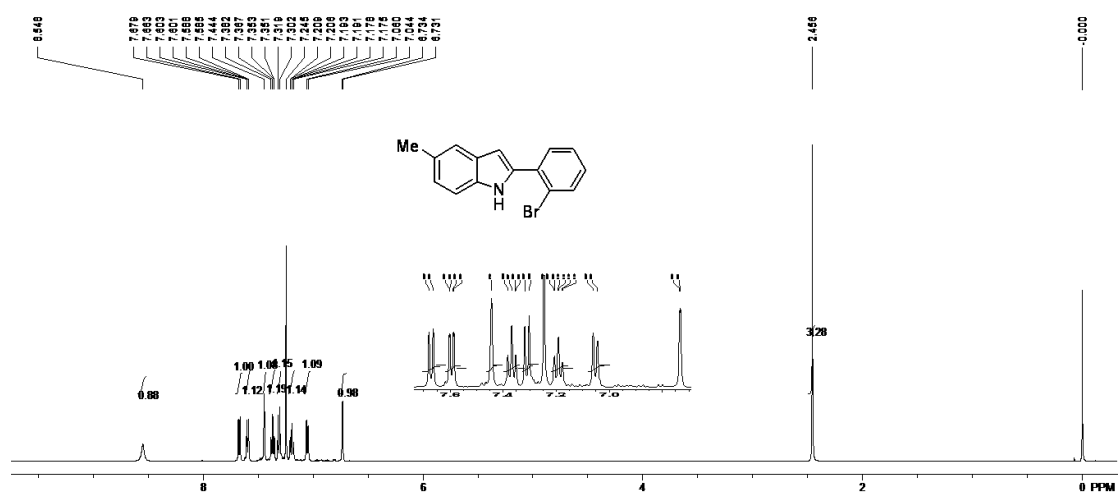

<sup>1</sup>H NMR of substrate **2d**

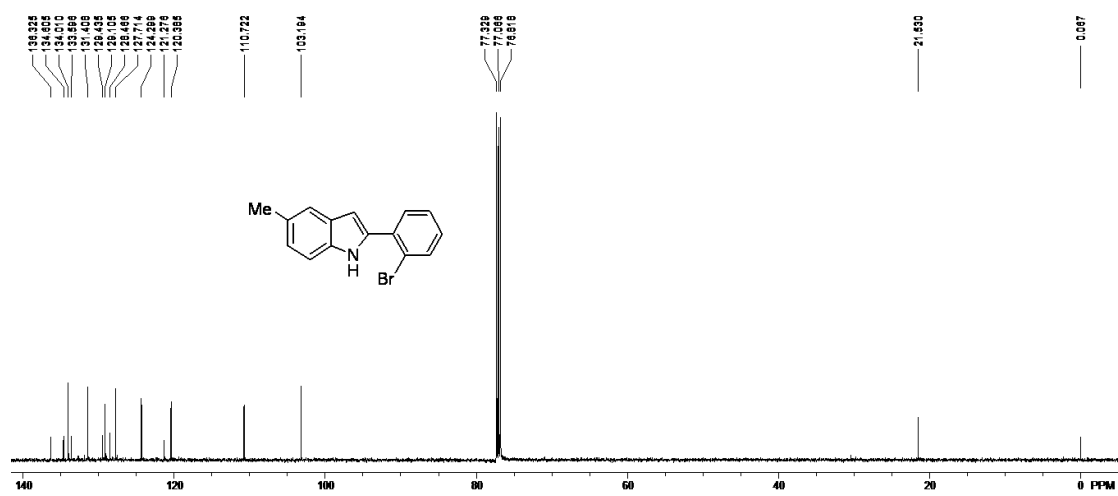

<sup>13</sup>C NMR of substrate **2d**

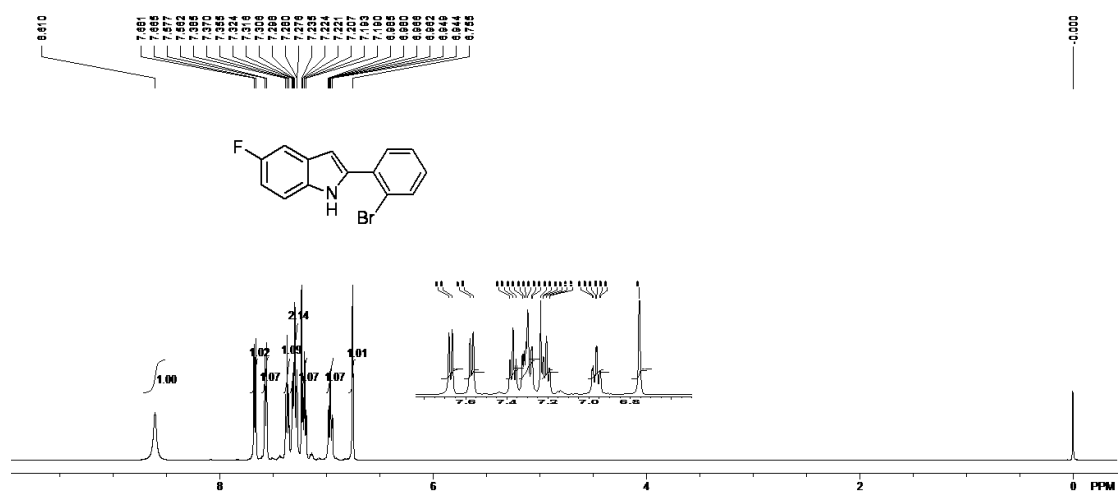

<sup>1</sup>H NMR of substrate **2e**

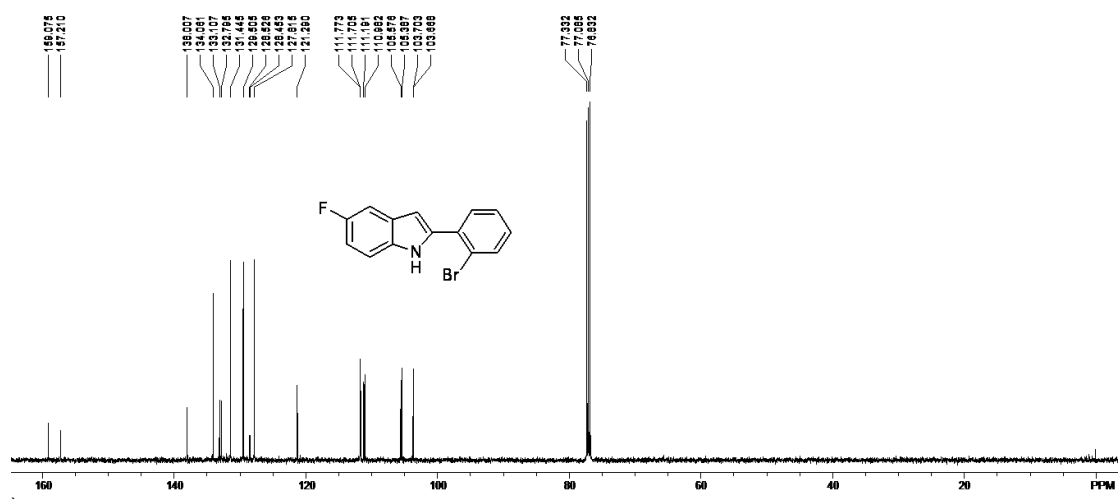

<sup>13</sup>C NMR of substrate **2e**

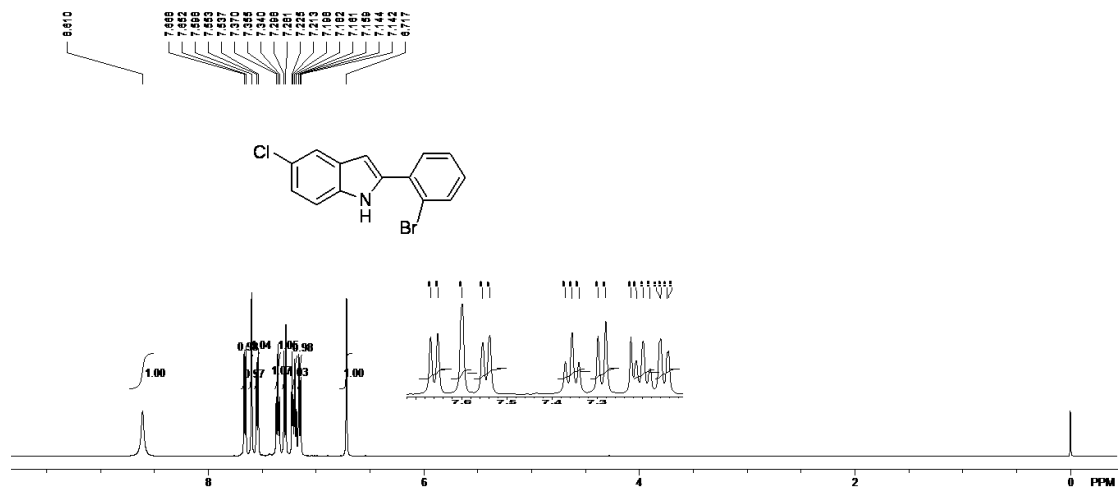

### $^1\text{H}$ NMR of substrate **2f**

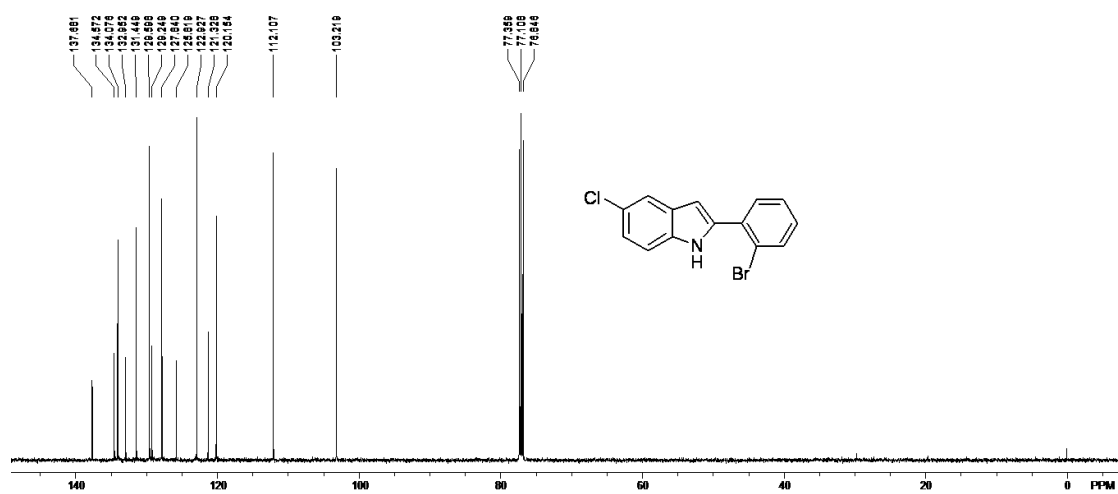

### $^{13}\text{C}$ NMR of substrate **2f**

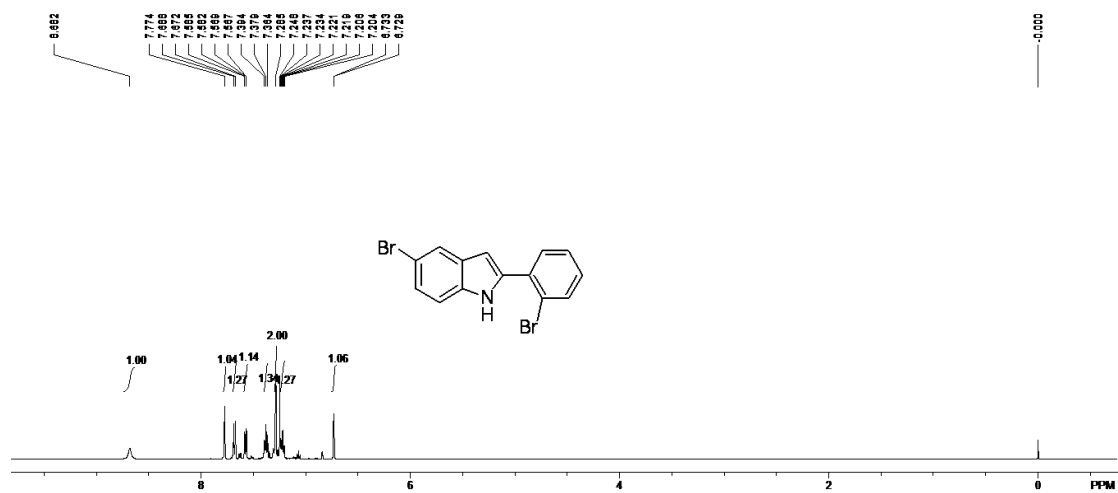

### $^1\text{H}$ NMR of substrate **2g**

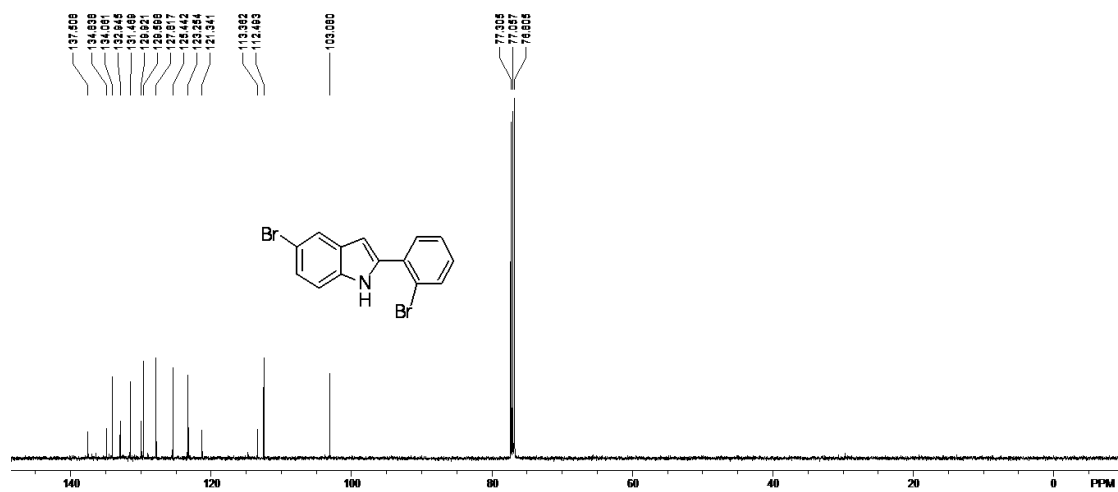

<sup>13</sup>C NMR of substrate **2g**

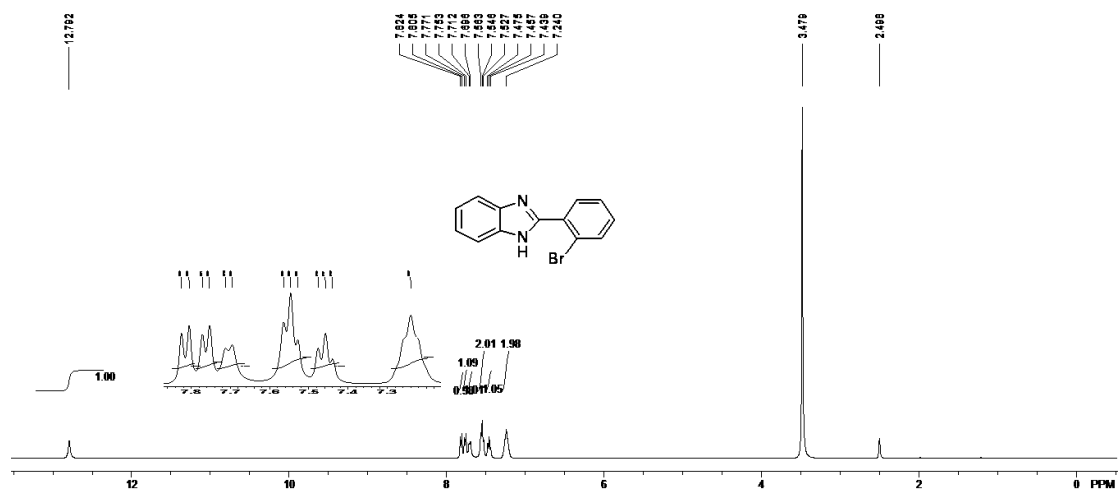

<sup>1</sup>H NMR of substrate **2h**

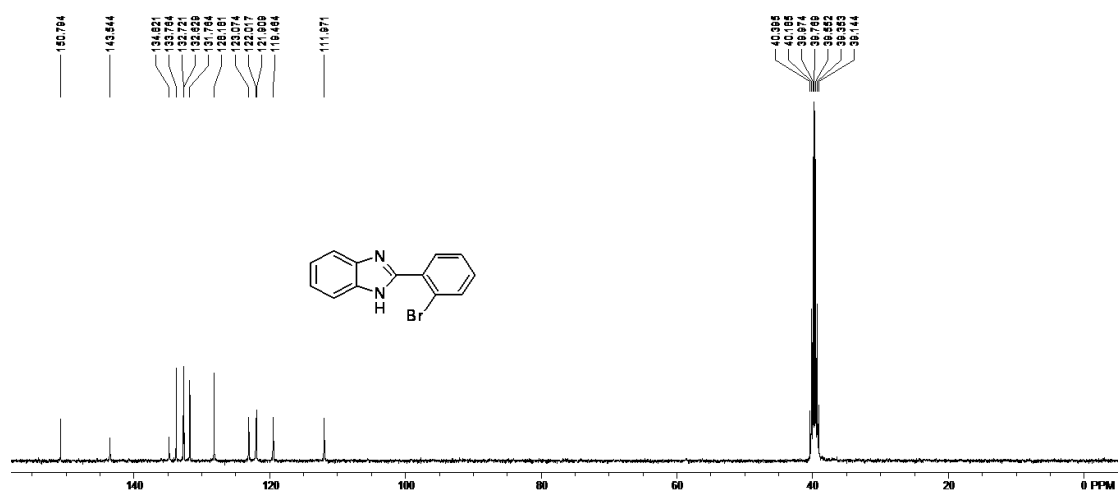

<sup>13</sup>C NMR of substrate **2h**

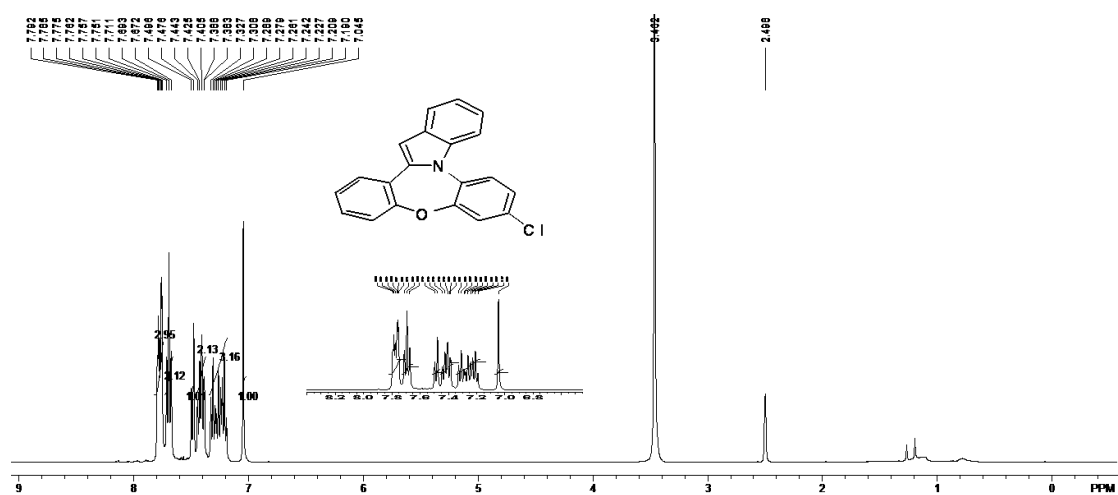

<sup>1</sup>H NMR of product **3a**

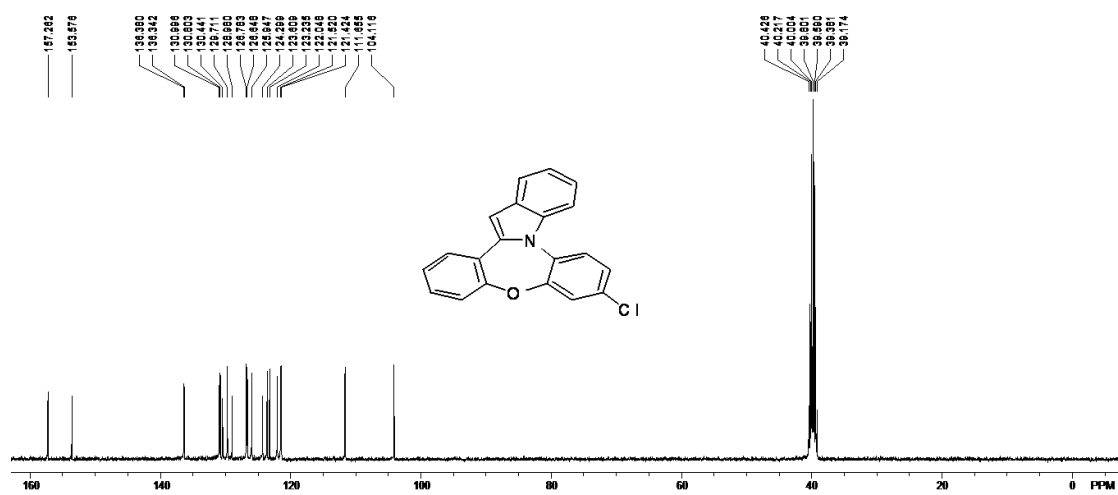

<sup>13</sup>C NMR of product **3a**

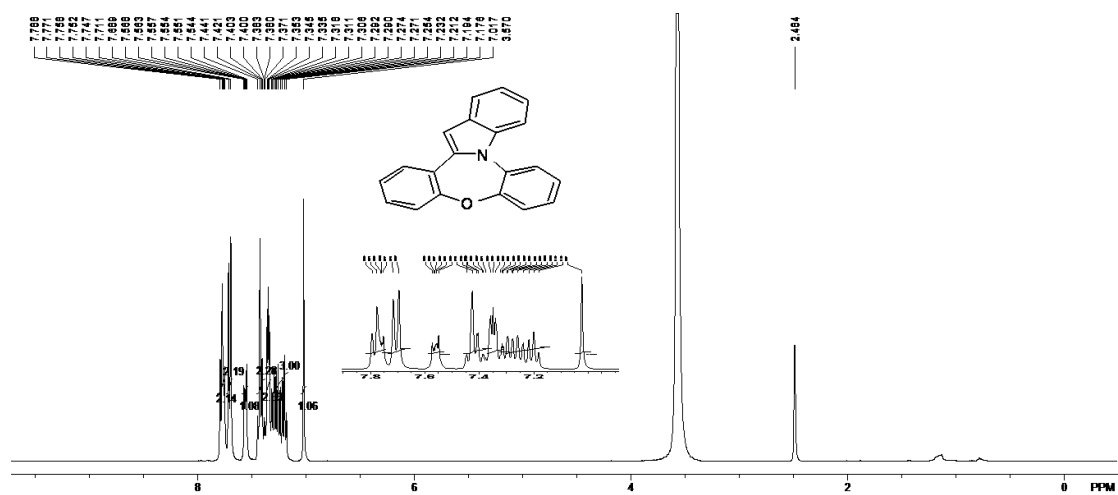

<sup>1</sup>H NMR of product **3b**

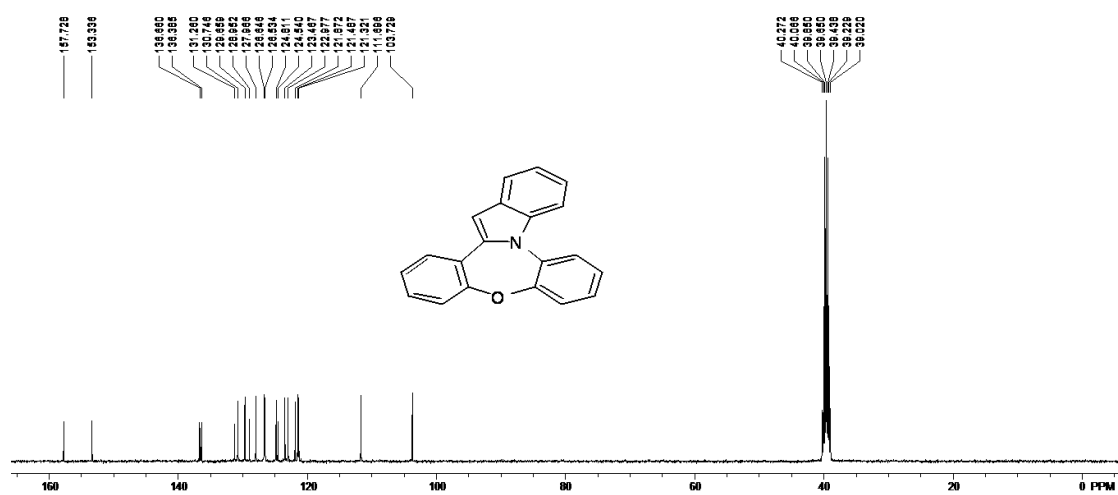

<sup>13</sup>C NMR of product **3b**

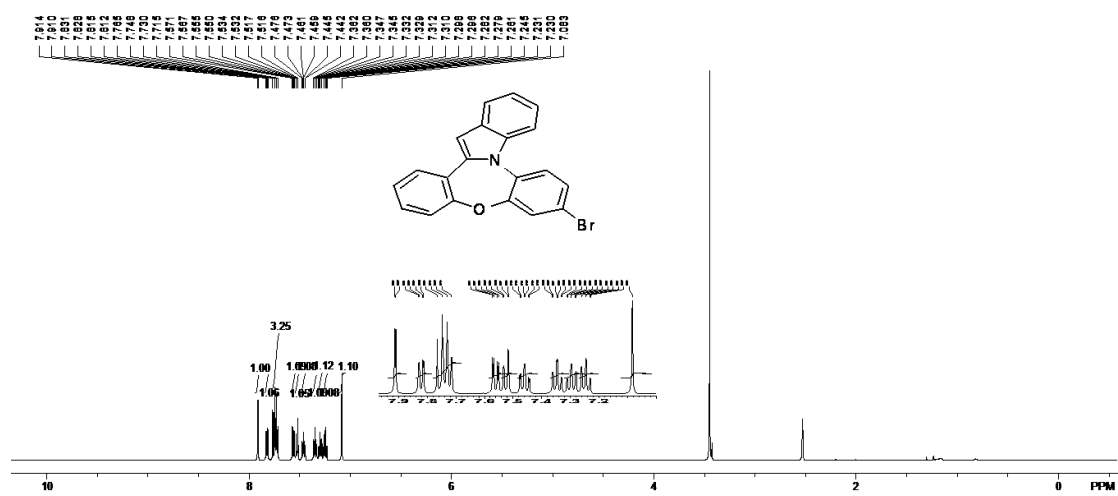

<sup>1</sup>H NMR of product **3c**

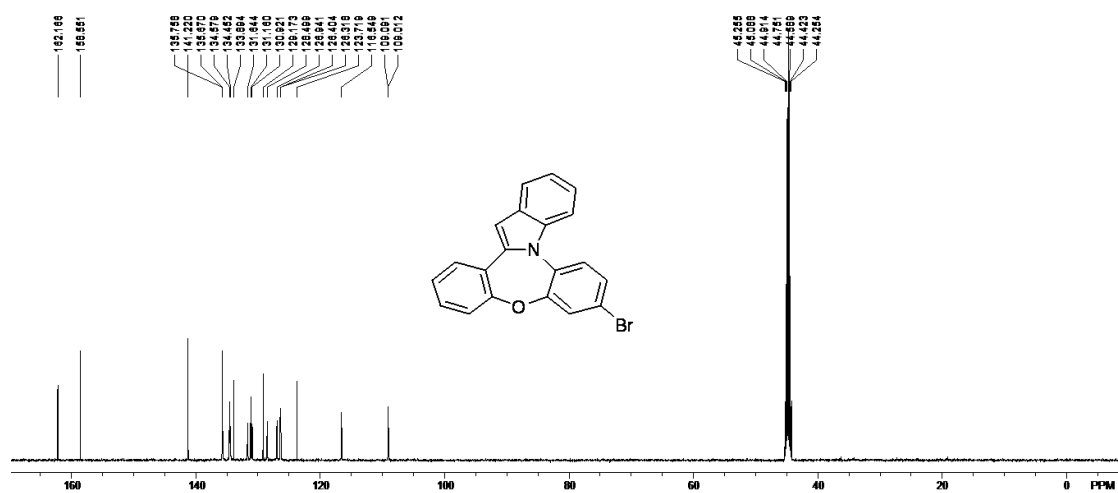

<sup>13</sup>C NMR of product **3c**

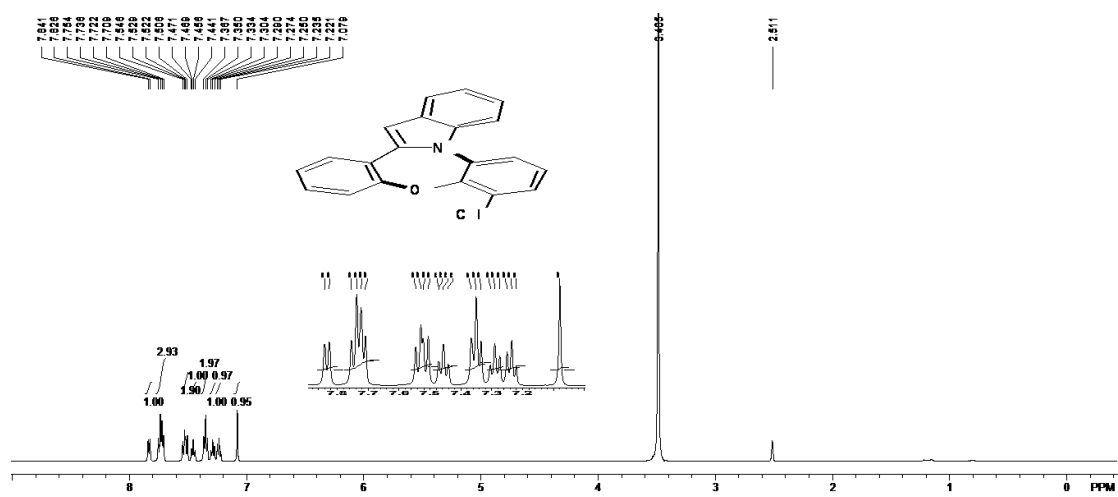

<sup>1</sup>H NMR of product **3d**

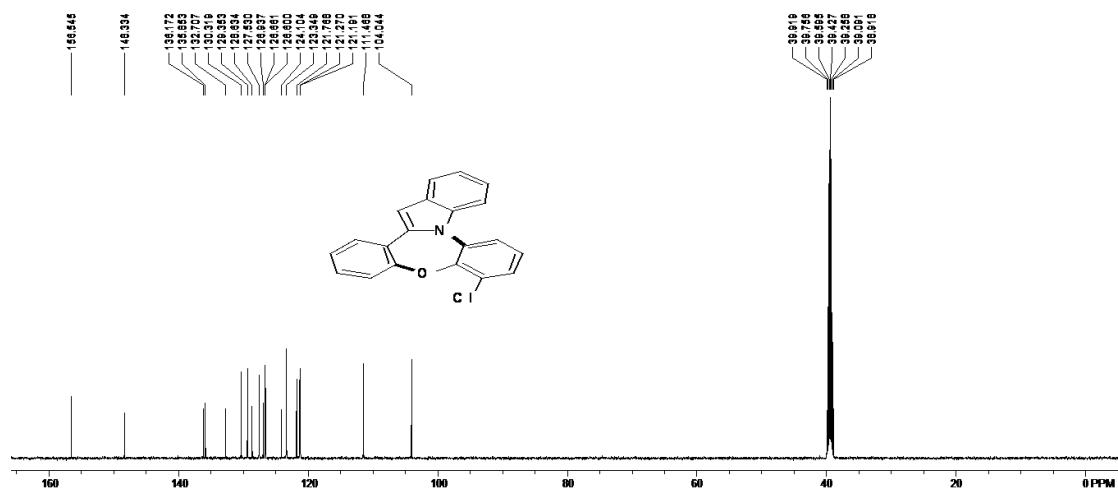

<sup>13</sup>C NMR of product 3d

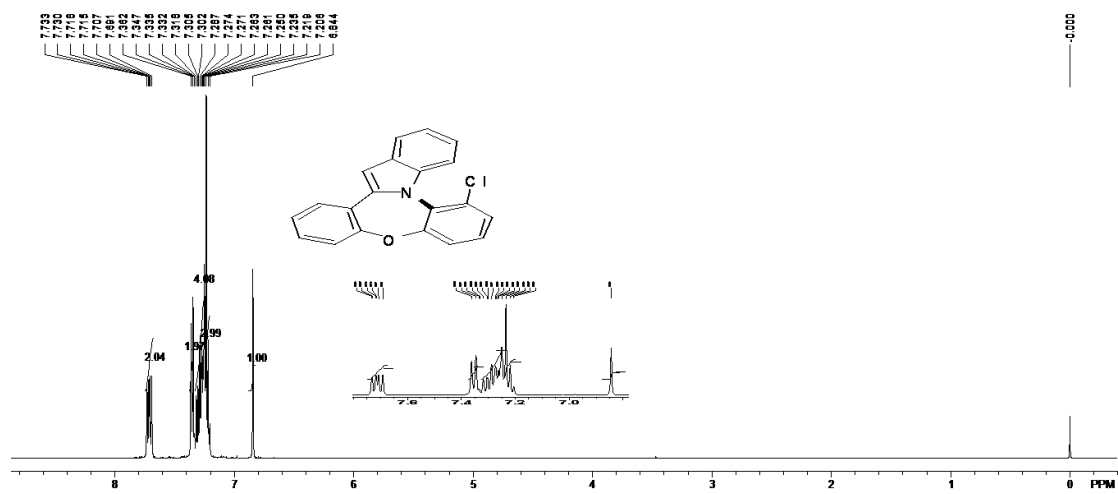

<sup>1</sup>H NMR of product 3e

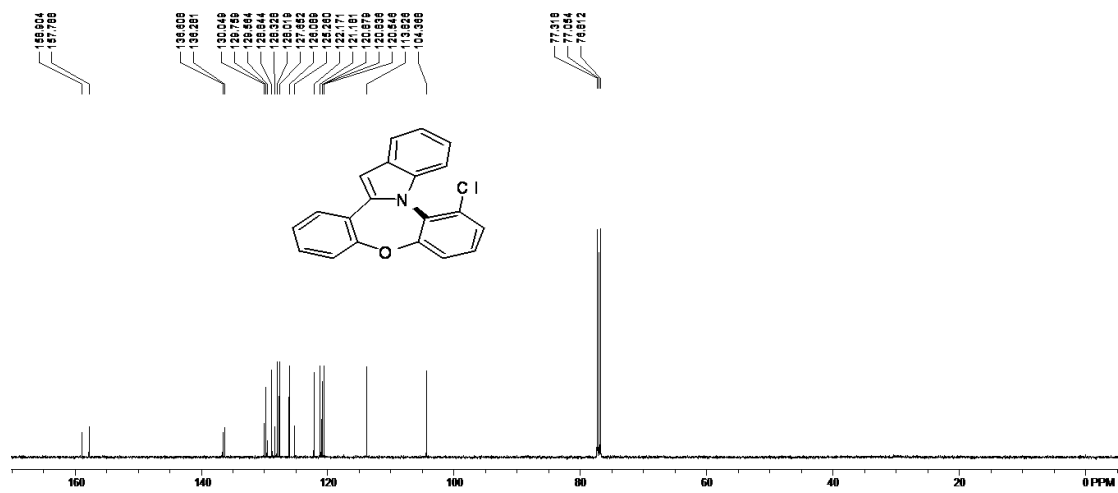

<sup>13</sup>C NMR of product 3e





### $^1\text{H}$ NMR of product **3g**

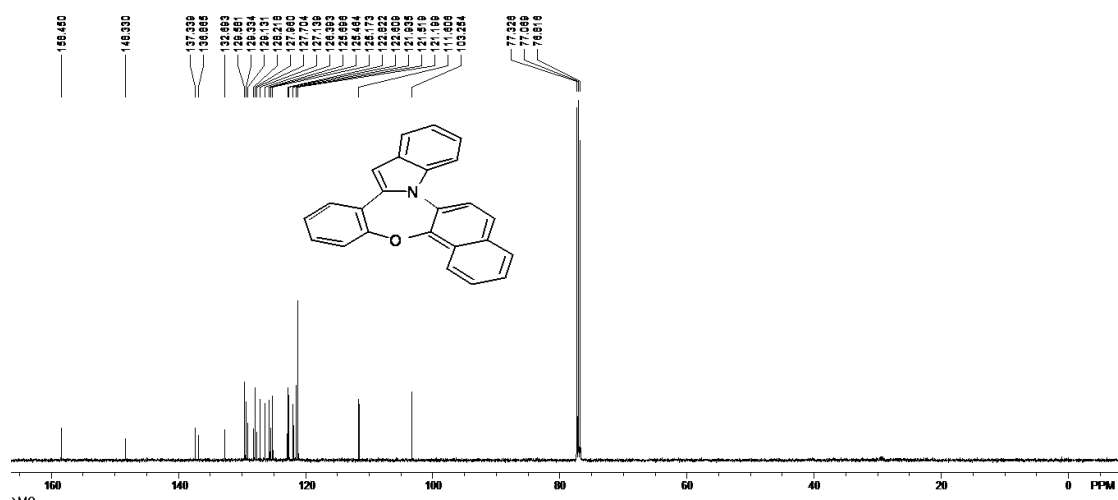

### $^{13}\text{C}$ NMR of product **3g**

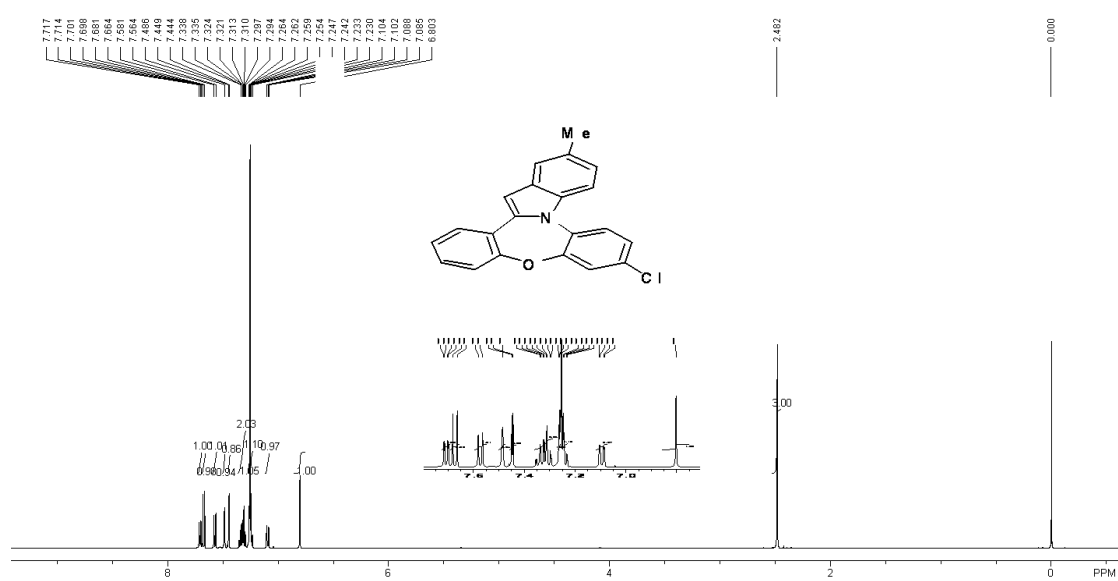

### $^1\text{H}$ NMR of product **3h**

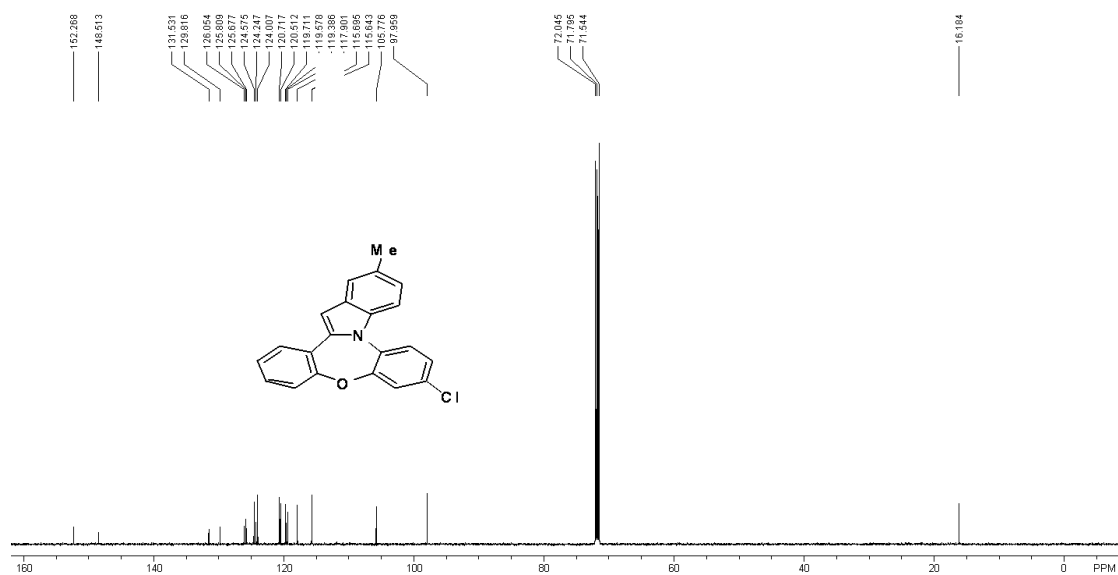

$^{13}\text{C}$  NMR of product 3h

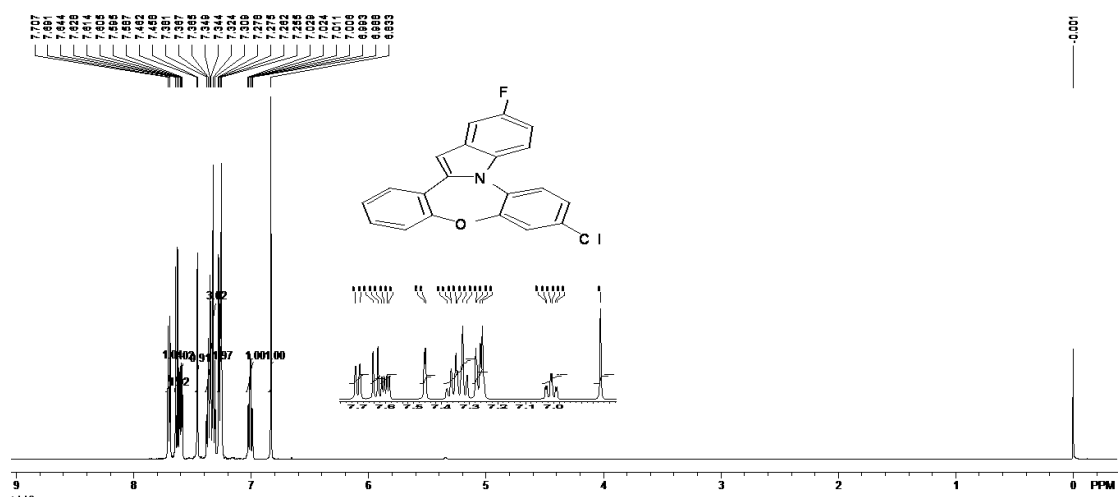

$^1\text{H}$  NMR of product 3i

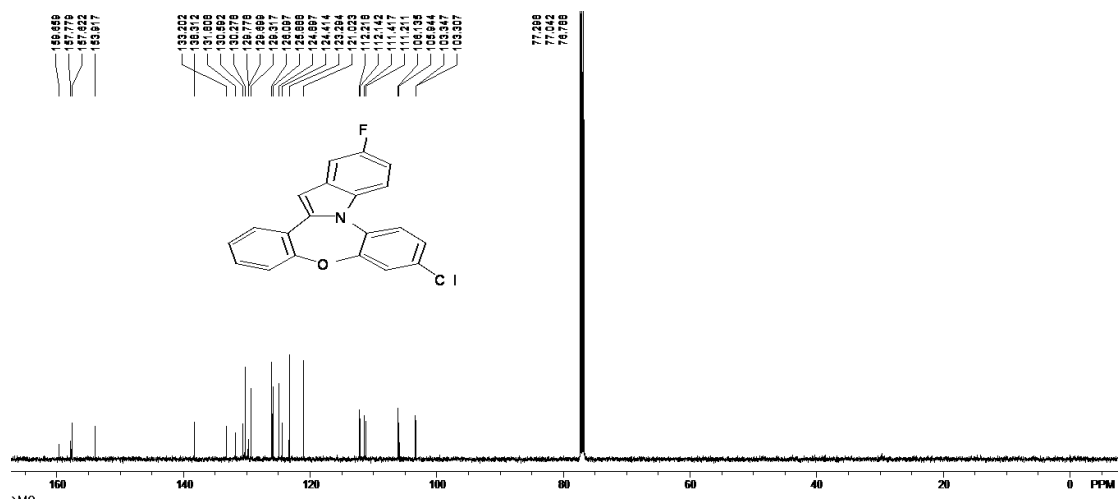



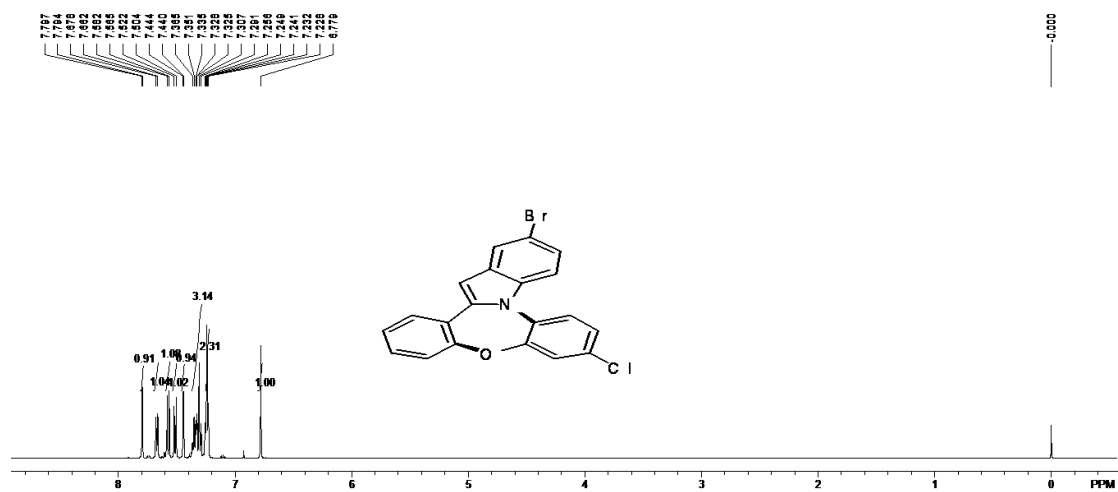

<sup>1</sup>H NMR of product 3k

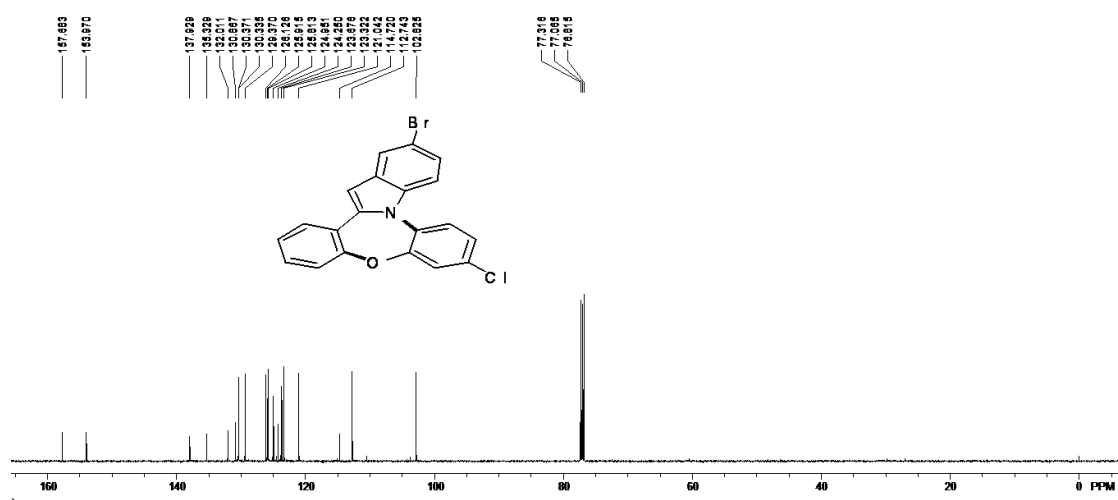

<sup>13</sup>C NMR of product 3k

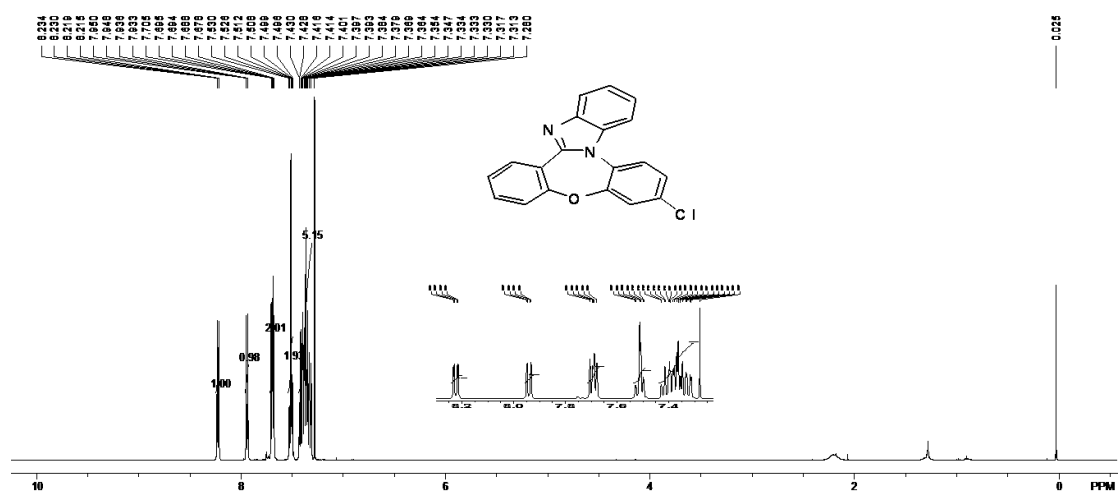

<sup>1</sup>H NMR of product 3l

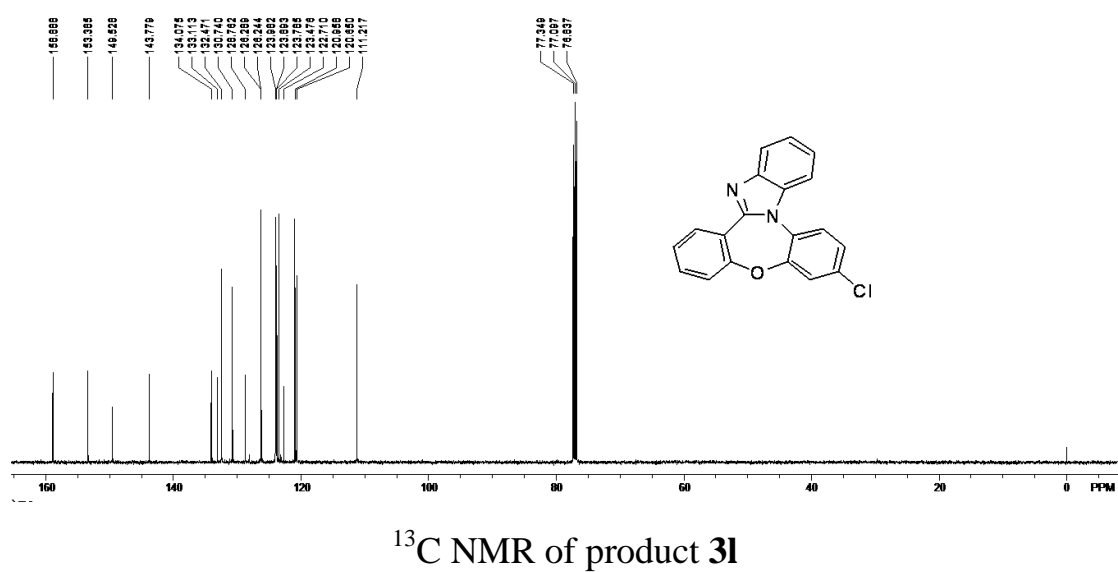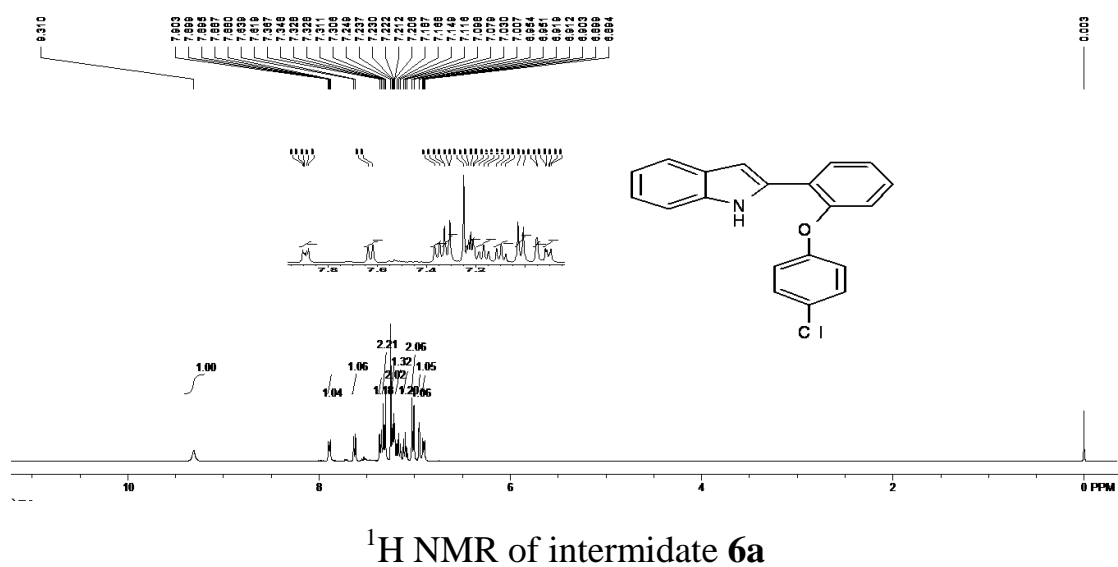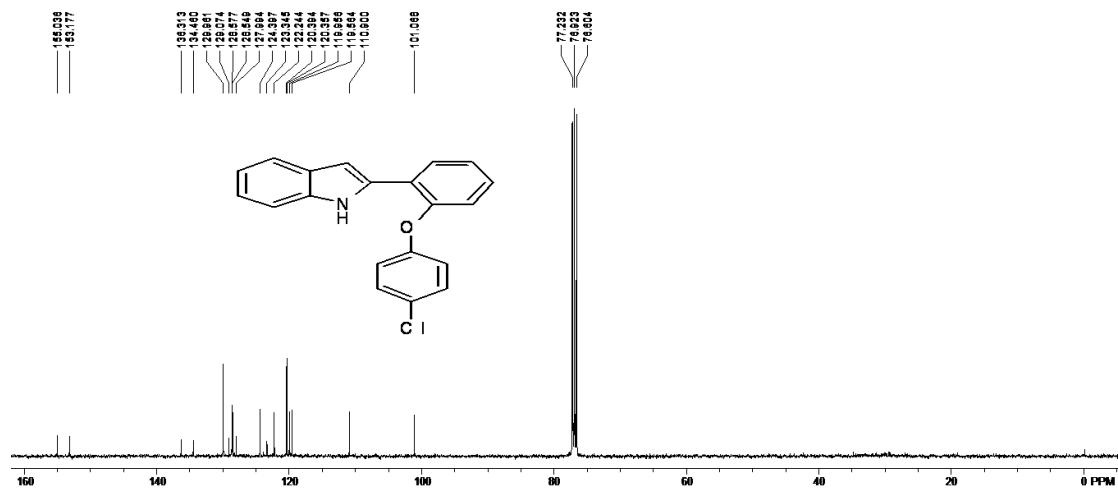

### <sup>13</sup>C NMR of intermediate **6a**

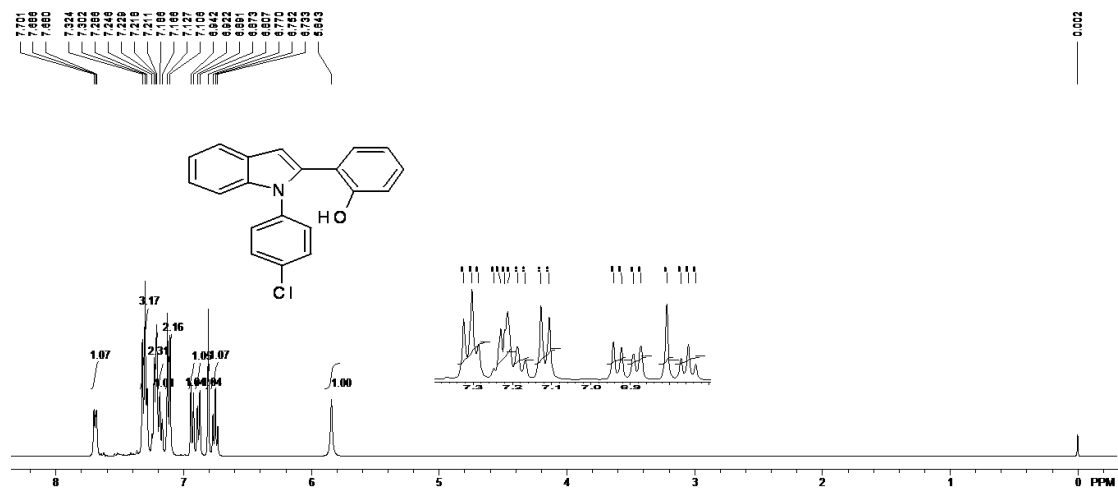

### <sup>1</sup>H NMR of intermediate **7a**

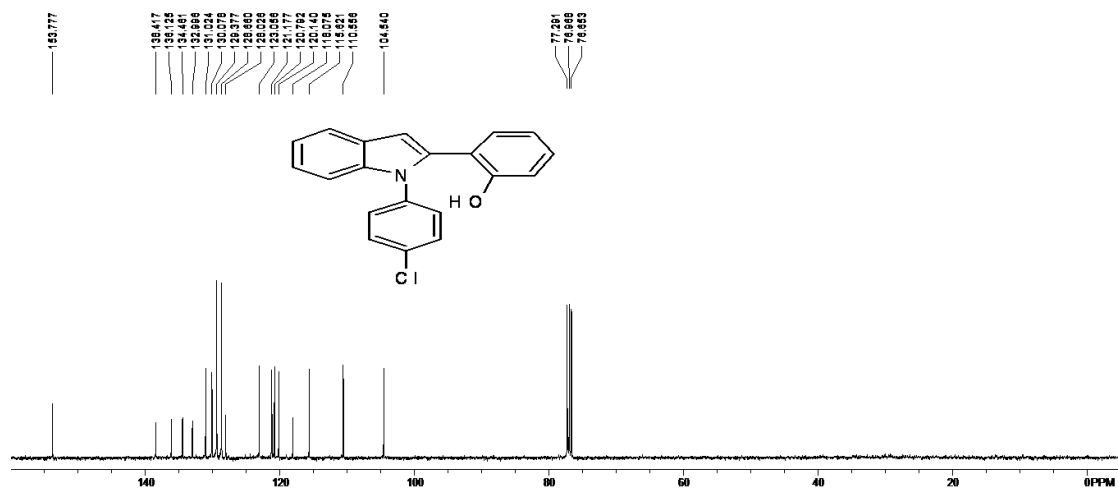

### <sup>13</sup>C NMR of intermediate **7a**
